# Supplementary material for: Synthesis of 6,13-difluoropentacene
Source: publisher site journal article supplement (doi:10.3762/bjoc.16.181), 2020-09-02
Supplement: Additional file 1 [file 1860-5397-16-181-S1.pdf]

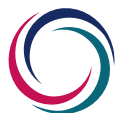

## Supporting Information

for

### Synthesis of 6,13-difluoropentacene

Matthias W. Tripp and Ulrich Koert

*Beilstein J. Org. Chem.* **2020**, *16*, 2136–2140. doi:10.3762/bjoc.16.181

**Experimental details, spectroscopic and analytical data of all  
new compounds**

## Table of contents

|                                              |     |
|----------------------------------------------|-----|
| 1. Methods and materials .....               | S3  |
| 2. Synthesis of 6,13-difluoropentacene ..... | S5  |
| 3. NMR spectra of all compounds .....        | S12 |
| 4. References .....                          | S19 |

# 1. Methods and materials

## General information

All anhydrous reactions were carried out using flame-dried glassware under argon atmosphere. All solvents were distilled by rotary evaporation. THF for anhydrous reactions was dried with KOH and subsequently distilled from sodium/benzophenone and from Solvona® respectively. All other solvents employed under anhydrous and/or anaerobic conditions were bought in anhydrous form. C<sub>6</sub>D<sub>6</sub> for NMR-measurements was degassed three times by freeze-pump-thaw cycles prior to use. All commercially available reagents and reactants were used without further purification unless otherwise noted. Reactions were monitored by thin layer chromatography (TLC) using Merck Silica Gel 60 F<sub>254</sub> and visualized by fluorescence quenching under UV-light. In addition, TLC-plates were stained using a cerium sulfate/phosphomolybdic acid stain or a potassium permanganate stain. Chromatographic purification of products was performed on Macherey-Nagel Silica Gel 60 (230–400 mesh) using a forced flow of eluents. All crude products were adsorbed onto silica by dissolving in an appropriate solvent and removing the solvent under reduced pressure. Concentration under reduced pressure was performed by rotary evaporation at 40 °C and appropriate pressure and by exposing to high vacuum at room temperature if necessary.

## NMR-Spectroscopy

NMR spectra were recorded on a Bruker AVIII HD250, AVII 300, AVIII HD300, AVIII 500 or AVIII HD500 spectrometer at room temperature unless otherwise mentioned. Chemical shifts are reported in ppm with the solvent resonance as internal standard. All reported <sup>19</sup>F-NMR spectra are proton decoupled <sup>19</sup>F{<sup>1</sup>H}-measurements and referenced to external CFCI<sub>3</sub>. Data are reported as follows: s = singlet, d = doublet, t = triplet, q = quartet, quin = quintet, m = multiplet and combination thereof. Due to the low solubility of compounds **5** & **16** no <sup>13</sup>C NMR spectra were obtained. All correlations of atoms from NMR spectra of new compounds could be achieved via additional 2D-NMR data (HSQC- and HMBC-spectra) which is not shown within this Supporting Information.

## **High resolution mass spectrometry**

HR-ESI and APCI mass spectra were acquired with a Finnigan LTQ-FT Ultra mass spectrometer (Thermo Fischer Scientific). EI mass spectra were acquired with an AccuTOF GCv (Jeol) mass spectrometer.

## **Infrared spectroscopy**

FTIR spectra were recorded on a BRUKER IFS 200 spectrometer. Intensities are reported as follows: s = strong, m = medium, w = weak.

## **Melting points**

Melting points were determined on a MP70 (Mettler Toledo) using one end closed capillary tubes.

## **UV–vis spectroscopy**

UV–vis-spectra have been acquired with a Thermo Scientific Multiskan Go using quartz rectangular cuvettes (Teflon cover, 10 mm light path, 3.5 mL) by Aldrich.

## 2. Synthesis of 6,13-difluoropentacene

### 1,4-Difluoroanthracene-9,10-dione (**11**)<sup>[1]</sup>

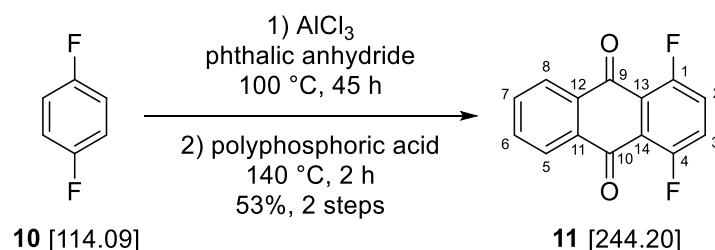

Following an adapted procedure of Krapcho et al., a suspension of phthalic anhydride (4.30 g, 29.0 mmol, 1.00 equiv) and AlCl<sub>3</sub> (15.4 g, 116 mmol, 4.00 equiv) in 1,4-difluorobenzene **10** (30 mL, 290 mmol, 10.0 equiv) was stirred at 100 °C for 45 h. Excess 1,4-difluorobenzene (26 mL, 253 mmol, 8.72 eq.) was reisolated *via* distillation and the residue was taken up in CHCl<sub>3</sub> (250 mL) and 1 M a. HCl (170 mL). The layers were separated and the aqueous layer extracted with CHCl<sub>3</sub> (3 × 80 mL). The combined organic layers were dried over MgSO<sub>4</sub> and the solvent was removed under reduced pressure. The residue was dissolved in CHCl<sub>3</sub> (20 mL) and *n*-hexane (45 mL) was added. The mixture was incubated at -20 °C for 16 h and the precipitate was filtered and dried under reduced pressure.

The crude 2-(2,5-difluorobenzoyl)benzoic acid was suspended in polyphosphoric acid (41.2 g) and the suspension was stirred at 140 °C for 2 h. The mixture was cooled to room temperature and poured into ice-water (200 mL) and CH<sub>2</sub>Cl<sub>2</sub> (200 mL) and neutralized to pH = 7 using K<sub>2</sub>CO<sub>3</sub>. The layers were separated and the aqueous layer was extracted with CH<sub>2</sub>Cl<sub>2</sub> (3 × 150 mL). The combined organic layers were dried over MgSO<sub>4</sub> and filtered over Alox (basic). The crude product was adsorbed onto silica and purified via column chromatography (*n*-hexane/CHCl<sub>3</sub> 3:7) to obtain anthraquinone **11** (3.72 g, 15.2 mmol, 53% over two steps) as yellow solid.

**TLC:** R<sub>f</sub> = 0.44 (*n*-pentane/EtOAc 5:1).

**<sup>1</sup>H-NMR:** 250 MHz, CDCl<sub>3</sub>; δ = 8.26 (dd, *J* = 5.8, 3.3 Hz, 2H, *H*6 & *H*7), 7.81 (dd, *J* = 5.8, 3.3 Hz, 2H, *H*5 & *H*8), 7.51-7.46 (m, 2H, *H*2 & *H*3) ppm.

**<sup>13</sup>C-NMR:** 75 MHz, CDCl<sub>3</sub>; δ = 180.7 (s, 2C, C9 & C10), 157.8 (dd, *J* = 268.5, 4.0 Hz, 2C, C1 & C4), 134.5 (s, 2C, C5 & C8), 133.4 (s, 2C, C11 &

C12), 127.1 (s, 2C, C6 & C7), 124.7 (dd,  $J = 19.5, 15.1$  Hz, 2C, C2 & C3), 121.8 (d,  $J = 2.2$  Hz, 2C, C13 & C14) ppm.

**$^{19}\text{F}$ -NMR:** 235 MHz,  $\text{CDCl}_3$ ;  $\delta = -114.3$  (s, 2F, F1 & F4) ppm.

**HR-MS:** EI(+);  $m/z$  calc. for  $\text{C}_{14}\text{H}_6\text{F}_2\text{O}_2$   $[\text{M}]^+$ : 244.03359, found: 244.03415.

**FT-IR:** film;  $\tilde{\nu} = 3087$  (w), 2926 (w), 1777 (w), 1715 (w), 1679 (s), 1591 (m), 1497 (w), 1469 (w), 1416 (m), 1337 (m), 1311 (w), 1287 (w), 1253 (s), 1170 (w), 1082 (w), 1064 (w), 1024 (w), 935 (w), 892 (w), 870 (w), 843 (w), 819 (w), 798 (w), 746 (w), 722 (m), 690 (w), 653 (w), 565 (w), 421 (w)  $\text{cm}^{-1}$ .

**m.p.:** 232 °C ( $\text{CDCl}_3$ ).

### 1,4-Difluoroanthracene (**9**)

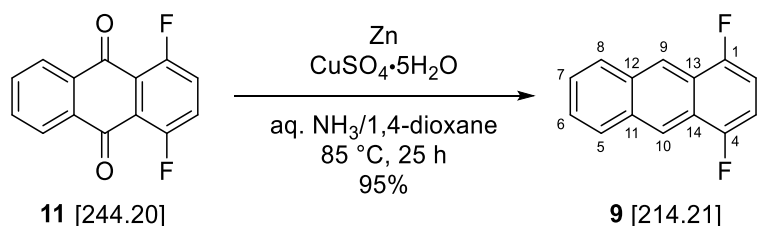

A suspension of anthraquinone **11** (200 mg, 819  $\mu\text{mol}$ , 1.00 equiv), zinc powder (214 mg, 3.28 mmol, 4.00 equiv) and  $\text{CuSO}_4 \cdot 5\text{H}_2\text{O}$  (10 mg, 41.0  $\mu\text{mol}$ , 0.05 equiv) in 1,4-dioxane (4.0 mL) and aq  $\text{NH}_3$  (25%, 4.0 mL) was stirred at 85 °C for 25 h in a pressure tube under vigorous stirring. The suspension was filtered over celite and washed with 2 M aq HCl (60 mL). The aqueous layer was reextracted with EtOAc (2  $\times$  60 mL) and the combined organic layers were washed with brine (30 mL) and dried over  $\text{MgSO}_4$ . The crude product was adsorbed onto silica and purified via column chromatography ( $n$ -pentane) to obtain anthracene **9** (166 mg, 775  $\mu\text{mol}$ , 95%) as colorless solid.

**TLC:**  $R_f = 0.81$  ( $n$ -pentane/EtOAc 50:1).

**<sup>1</sup>H-NMR:** 500 MHz, CDCl<sub>3</sub>;  $\delta$  = 8.65 (s, 2H, *H*9 & *H*10), 8.06 (dd, *J* = 6.4, 3.3 Hz, 2H, *H*5 & *H*8), 7.55 (dd, *J* = 6.6, 3.2 Hz, 2H, *H*6 & *H*7), 7.00 (dd, *J* = 7.4, 6.7 Hz, 2H, *H*2 & *H*3) ppm.

**<sup>13</sup>C-NMR:** 126 MHz, CDCl<sub>3</sub>;  $\delta$  = 154.9 (dd, *J* = 252.4, 6.0 Hz, 2C, *C*1 & *C*4), 132.1 (s, 2C, *C*11 & *C*12), 128.7 (s, 2C, *C*5 & *C*8), 126.8 (s, 2C, *C*6 & *C*7), 123.3 (dd, *J* = 14.5, 11.0 Hz, 2C, *C*13 & *C*14), 120.1 (t, *J* = 2.7 Hz, 2C, *C*9 & *C*10), 106.5 (dd, *J* = 19.0, 12.4 Hz, 2C, *C*2 & *C*3) ppm.

**<sup>19</sup>F-NMR:** 283 MHz, CDCl<sub>3</sub>;  $\delta$  = −127.0 (s, 2F, *F*1 & *F*4) ppm.

**HR-MS:** EI(+); *m/z* calc. for C<sub>14</sub>H<sub>8</sub>F<sub>2</sub> [M]<sup>+</sup>: 214.05941, found: 214.05990.

**FT-IR:** film;  $\tilde{\nu}$  = 3058 (w), 2960 (w), 2928 (w), 2855 (w), 2254 (w), 1650 (w), 1581 (w), 1462 (w), 1382 (w), 1320 (w), 1261 (w), 1237 (w), 1202 (w), 1139 (w), 1096 (w), 1019 (w), 957 (w), 904 (s), 818 (w), 725 (s), 650 (w), 612 (w), 468 (w), 434 (w) cm<sup>−1</sup>.

**m.p.:** 107 °C (CDCl<sub>3</sub>).

## 2-(1,4-Difluoroanthracene-2-carbonyl)benzoic acid (**12**)

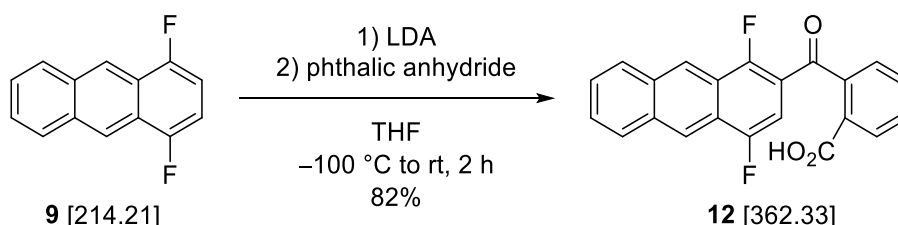

*n*-BuLi (2.5 M in *n*-hexane, 196  $\mu$ L, 490  $\mu$ mol, 1.05 equiv) was added dropwise to a solution of *N,N*-diisopropylamine (72.2  $\mu$ L, 514  $\mu$ mol, 1.10 equiv) in THF (1.2 mL) at 0 °C. The mixture was stirred at 0 °C for 15 min and then cooled to −78 °C. A solution of anthracene **9** (100 mg, 467  $\mu$ mol, 1.00 eq.) in THF (1.0 mL) was added dropwise and the resulting orange solution was stirred at −78 °C for 15 min. The mixture was added to a suspension of phthalic anhydride (83 mg, 560  $\mu$ mol, 1.20 equiv) in THF (1.8 mL) at −100 °C and stirred at this temperature for 1 h. The cooling bath was removed and the solution was stirred additional 1 h at room temperature before 2 M aq HCl (25 mL) was added. The mixture was extracted with EtOAc (2  $\times$  30 mL) and the combined organic layers were dried over MgSO<sub>4</sub>. The crude product was adsorbed

onto silica and purified via column chromatography (*n*-pentane/EtOAc/AcOH 5:1:0.1) to obtain carboxylic acid **12** (138 mg, 381  $\mu$ mol, 82%) as yellow solid.

**TLC:**  $R_f$  = 0.26 (*n*-pentane/EtOAc/AcOH 4:1:0.1).

**$^1\text{H-NMR}$ :** 500 MHz, acetone- $d_6$ ;  $\delta$  = 11.64 (s, 1H, COOH), 8.76 (s, 1H,  $H_{ar.}$ ), 8.75 (s, 1H,  $H_{ar.}$ ), 8.25 (d,  $J$  = 8.4 Hz, 1H,  $H_{ar.}$ ), 8.19 (d,  $J$  = 8.4 Hz, 1H,  $H_{ar.}$ ), 8.15 (d,  $J$  = 7.5 Hz, 1H,  $H_{ar.}$ ), 7.81 (td,  $J$  = 7.5, 1.0 Hz, 1H,  $H_{ar.}$ ), 7.74-7.65 (m, 3H, 3 x  $H_{ar.}$ ), 7.59-7.56 (m, 2H, 2 x  $H_{ar.}$ ) ppm.

**$^{13}\text{C-NMR}$ :** 126 MHz, acetone- $d_6$ ;  $\delta$  = 192.7 (s, 1C, CO), 167.4 (s, 1C, COOH), 156.5 (d,  $J$  = 265.0 Hz, 1C, CF), 155.4 (dd,  $J$  = 250.0, 3.0 Hz, 1C, CF), 145.6 (s, 1C,  $C_{ar.}$ ), 134.4 (s, 1C,  $C_{ar.}$ ), 133.7 (s, 1C,  $C_{ar.}$ ), 133.3 (d,  $J$  = 2.0 Hz, 1C,  $C_{ar.}$ ), 131.0 (s, 1C,  $C_{ar.}$ ), 130.5 (s, 1C,  $C_{ar.}$ ), 129.7 (s, 1C,  $C_{ar.}$ ), 129.5 (s, 1C,  $C_{ar.}$ ), 129.4 (s, 1C,  $C_{ar.}$ ), 129.1 (s, 1C,  $C_{ar.}$ ), 128.4 (s, 1C,  $C_{ar.}$ ), 127.6 (s, 1C,  $C_{ar.}$ ), 125.3-125.1 (m, 1C,  $C_{ar.}$ ), 123.7-123.5 (m, 2C, 2 x  $C_{ar.}$ ), 120.8 (s, 1C,  $C_{ar.}$ ), 119.0-118.9 (m, 1C,  $C_{ar.}$ ), 106.2 (d,  $J$  = 24.0 Hz, 1C,  $C_{ar.}$ ) ppm.

**$^{19}\text{F-NMR}$ :** 235 MHz, acetone- $d_6$ ;  $\delta$  = -119.4 (d,  $J$  = 22.2 Hz, 1F), -127.7 (d,  $J$  = 22.0 Hz, 1F) ppm.

**HR-MS:** ESI(-);  $m/z$  calc. for  $\text{C}_{22}\text{H}_{11}\text{F}_2\text{O}_3$   $[\text{M-H}]^-$ : 361.0682, found: 361.0683.

**FT-IR:** film;  $\tilde{\nu}$  = 3058 (w), 2658 (w), 2542 (w), 1774 (w), 1691 (w), 1665 (w), 1639 (s), 1596 (w), 1577 (w), 1541 (w), 1488 (w), 1438 (w), 1410 (w), 1389 (w), 1369 (s), 1329 (m), 1285 (w), 1265 (w), 1233 (s), 1164 (w), 1142 (m), 1109 (w), 1076 (w), 1056 (w), 974 (w), 885 (m), 829 (w), 771 (w), 736 (s), 712 (w), 667 (m), 644 (w), 559 (w), 471 (m)  $\text{cm}^{-1}$ .

**m.p.:** 203  $^{\circ}\text{C}$  decomposition (toluene).



### 6,13-Difluoropentacene-5,14-dione (**16**)

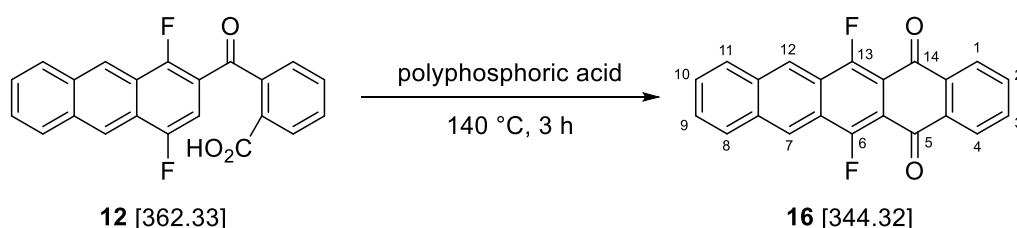

A suspension of carboxylic acid **12** (30 mg, 82.8  $\mu$ mol, 1.00 equiv) in polyphosphoric acid (1.30 g) was stirred at 140 °C for 3 h. The mixture was cooled to room temperature and taken up in CH<sub>2</sub>Cl<sub>2</sub> (30 mL) and H<sub>2</sub>O (30 mL). The layers were separated and the aqueous layer was extracted with CH<sub>2</sub>Cl<sub>2</sub> (2  $\times$  30 mL). The combined organic layers were dried over MgSO<sub>4</sub> and the solvent was removed under reduced pressure to obtain the crude pentacenequinone **16** as red solid, which was used in the next step without further purification.

**TLC:**  $R_f$  = 0.49 (CH<sub>2</sub>Cl<sub>2</sub>).

**<sup>1</sup>H-NMR:** 300 MHz, CD<sub>2</sub>Cl<sub>2</sub>;  $\delta$  = 8.98 (s, 2H, *H*7 & *H*12), 8.33 (dd, *J* = 5.8, 3.3 Hz, 2H, 2  $\times$  *H*<sub>ar.</sub>), 8.20 (dd, *J* = 6.4, 3.3 Hz, 2H, 2  $\times$  *H*<sub>ar.</sub>), 7.84 (dd, *J* = 5.8, 3.3 Hz, 2H, 2  $\times$  *H*<sub>ar.</sub>), 7.73 (dd, *J* = 6.5, 3.2 Hz, 2H, 2  $\times$  *H*<sub>ar.</sub>) ppm.

**<sup>19</sup>F-NMR:** 235 MHz, CD<sub>2</sub>Cl<sub>2</sub>;  $\delta$  = −117.9 (s, 2F, *F*6 & *F*13) ppm.

**HR-MS:** EI(+); *m/z* calc. for C<sub>22</sub>H<sub>10</sub>F<sub>2</sub>O<sub>2</sub> [*M*]<sup>+</sup>: 344.06489, found: 344.06531.

**FT-IR:** film;  $\tilde{\nu}$  = 2957 (w), 2920 (s), 2851 (w), 1775 (w), 1744 (w), 1678 (m), 1587 (w), 1530 (w), 1446 (m), 1384 (w), 1364 (w), 1344 (w), 1284 (w), 1256 (s), 1152 (w), 1092 (w), 1011 (s), 978 (w), 886 (w), 800 (s), 748 (w), 725 (m), 532 (w), 467 (w) cm<sup>−1</sup>.

**m.p.:** 238 °C decomposition (CH<sub>2</sub>Cl<sub>2</sub>).

### 6,13-Difluoro-5,14-dihydropentacene-5,14-diol (**13**)

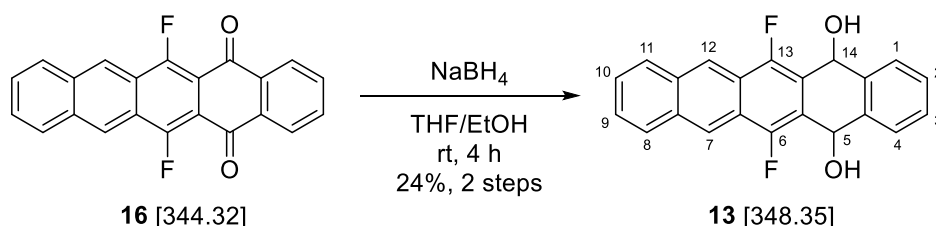

A suspension of pentacenequinone **16** (crude,  $\approx 82.8$   $\mu\text{mol}$ , 1.00 equiv) and  $\text{NaBH}_4$  (16 mg, 414  $\mu\text{mol}$ , 5.00 equiv) in THF (3.1 mL) and EtOH (2.0 mL) was stirred at room temperature under exclusion of light. After 2.5 h, additional  $\text{NaBH}_4$  (16 mg, 414  $\mu\text{mol}$ , 5.00 equiv) was added and the mixture was stirred for another 1.5 h. The reaction was cooled to 0  $^\circ\text{C}$  and quenched with silica (1.00 g) until gas evolution stopped. The crude product was adsorbed onto the silica and purified via column chromatography (*n*-pentane/ $\text{Et}_2\text{O}$  3:2  $\rightarrow$  0:1) to obtain diol **13** (7 mg, 20.1  $\mu\text{mol}$ , 24% over two steps) as yellow solid.

**TLC:**  $R_f = 0.31$  ( $\text{CH}_2\text{Cl}_2/\text{EtOAc}$  20:1).

**$^1\text{H-NMR}$ :** 300 MHz,  $\text{CD}_2\text{Cl}_2$ ;  $\delta = 8.72$  (s, 2H,  $H_7$  &  $H_{12}$ ), 8.11 (dd,  $J = 6.5, 3.4$  Hz, 2H, 2 x  $H_{ar.}$ ), 7.78 (dd,  $J = 5.7, 3.4$  Hz, 2H, 2 x  $H_{ar.}$ ), 7.59 (dd,  $J = 6.6, 3.2$  Hz, 2H, 2 x  $H_{ar.}$ ), 7.48 (dd,  $J = 5.7, 3.3$  Hz, 2H, 2 x  $H_{ar.}$ ), 6.37 (d,  $J = 2.3$  Hz, 2H,  $H_5$  &  $H_{14}$ ), 2.88 (s, 2H, 2 x OH) ppm.

**$^{19}\text{F-NMR}$ :** 235 MHz,  $\text{CD}_2\text{Cl}_2$ ;  $\delta = -131.1$  (s, 2F,  $F_6$  &  $F_{13}$ ) ppm.

**HR-MS:** APCI(-);  $m/z$  calc. for  $\text{C}_{22}\text{H}_{11}\text{F}_2\text{O}$   $[\text{M}-\text{H}_2\text{O}-\text{H}]^-$ : 329.0783, found: 329.0794.

**FT-IR:** film;  $\tilde{\nu} = 3315$  (s), 3108 (w), 2976 (w), 2927 (w), 2721 (w), 1681 (w), 1653 (w), 1612 (w), 1563 (w), 1477 (m), 1388 (m), 1368 (s), 1341 (w), 1317 (w), 1236 (w), 1175 (w), 1139 (w), 1027 (m), 991 (s), 972 (w), 935 (w), 900 (m), 809 (w), 781 (w), 759 (s), 741 (w), 726 (w), 664 (w), 635 (w), 552 (w), 530 (w), 480 (w), 460 (w)  $\text{cm}^{-1}$ .

**m.p.:** 82  $^\circ\text{C}$  decomposition ( $\text{Et}_2\text{O}$ ).

## 6,13-Difluoropentacene (F2PEN, **5**)

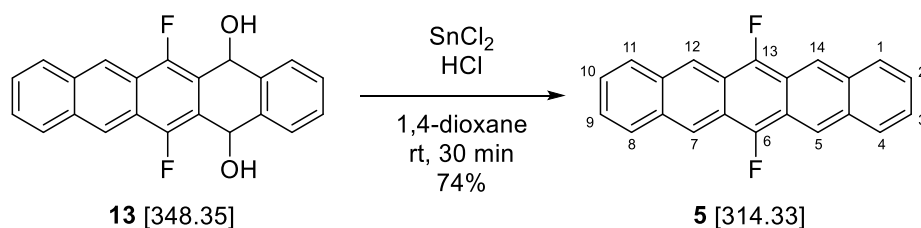

2 M aq HCl (0.20 mL) was added dropwise to a suspension of diol **13** (6 mg, 17.2  $\mu\text{mol}$ , 1.00 equiv) and  $\text{SnCl}_2$  (33 mg, 172  $\mu\text{mol}$ , 10.0 equiv) in degassed 1,4-dioxane (1.6 mL). The mixture was stirred vigorously for 30 min at room temperature under exclusion of light. The precipitate was centrifuged (13.000 rpm, 3 min) and washed with  $\text{H}_2\text{O}$  (1.0 mL) and acetone (1.0 mL) to obtain F2PEN **5** (4 mg, 12.7  $\mu\text{mol}$ , 74%) as dark purple solid.

**$^1\text{H-NMR}$ :** 300 MHz,  $\text{C}_6\text{D}_6$ ;  $\delta$  = 8.82 (s, 4H, *H5* & *H7* & *H12* & *H14*), 7.63 (dd,  $J$  = 6.6, 3.2 Hz, 4H, *H1* & *H4* & *H8* & *H11*), 7.04 (dd,  $J$  = 6.7, 3.2 Hz, 4H, *H2* & *H3* & *H9* & *H10*) ppm.

**$^{19}\text{F-NMR}$ :** 235 MHz,  $\text{C}_6\text{D}_6$ ;  $\delta$  =  $-132.1$  (s, 2F, *F6* & *F13*) ppm.

**HR-MS:** EI(+);  $m/z$  calc. for  $\text{C}_{22}\text{H}_{12}\text{F}_2$  [ $\text{M}$ ] $^+$ : 314.09071, found: 314.09089.

**FT-IR:** neat;  $\tilde{\nu}$  = 3042 (w), 2960 (w), 2919 (w), 1740 (w), 1670 (w), 1612 (w), 1572 (w), 1485 (w), 1447 (m), 1358 (s), 1341 (w), 1293 (w), 1270 (w), 1205 (w), 1180 (w), 1133 (w), 1050 (w), 1003 (m), 952 (w), 925 (w), 865 (s), 762 (w), 734 (s), 671 (m), 629 (w), 565 (w), 536 (w), 513 (w), 482 (w), 455 (s)  $\text{cm}^{-1}$ .

**m.p.:** 288  $^\circ\text{C}$  decomposition (1,4-dioxane).

### 3. NMR spectra of all compounds

8.28  
8.26  
8.25  
8.24  
7.83  
7.82  
7.81  
7.79  
7.51  
7.49  
7.48  
7.46  
7.26

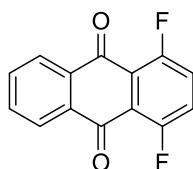

**11**

$^1\text{H-NMR}$ , 250 MHz,  
 $\text{CDCl}_3$

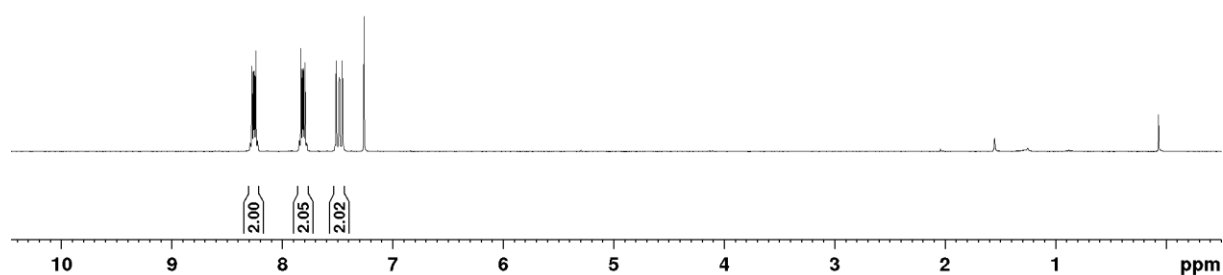

180.7  
159.6  
159.5  
159.0  
156.0  
133.4  
127.1  
124.9  
124.7  
124.7  
124.5  
124.5  
121.8  
121.6  
77.2

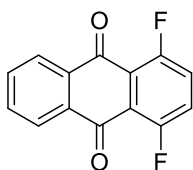

**11**

$^{13}\text{C-NMR}$ , 75 MHz,  
 $\text{CDCl}_3$

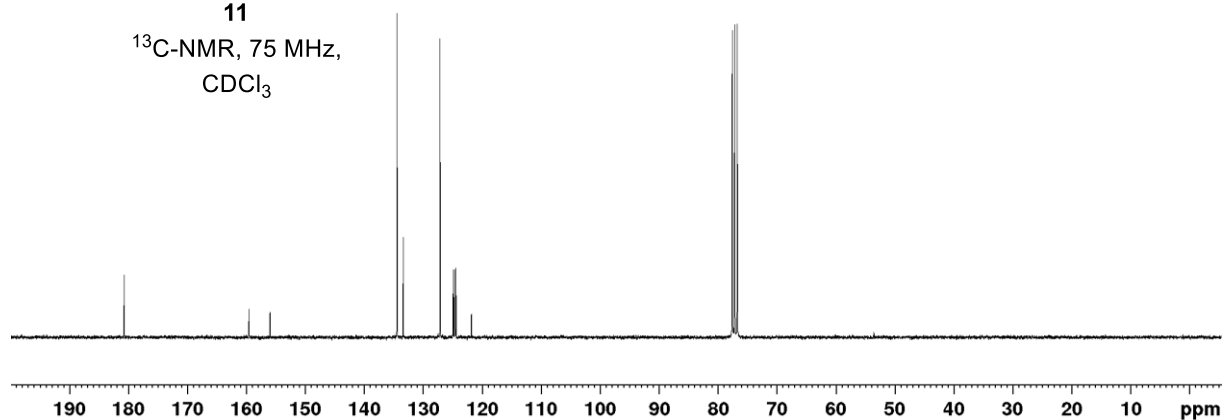

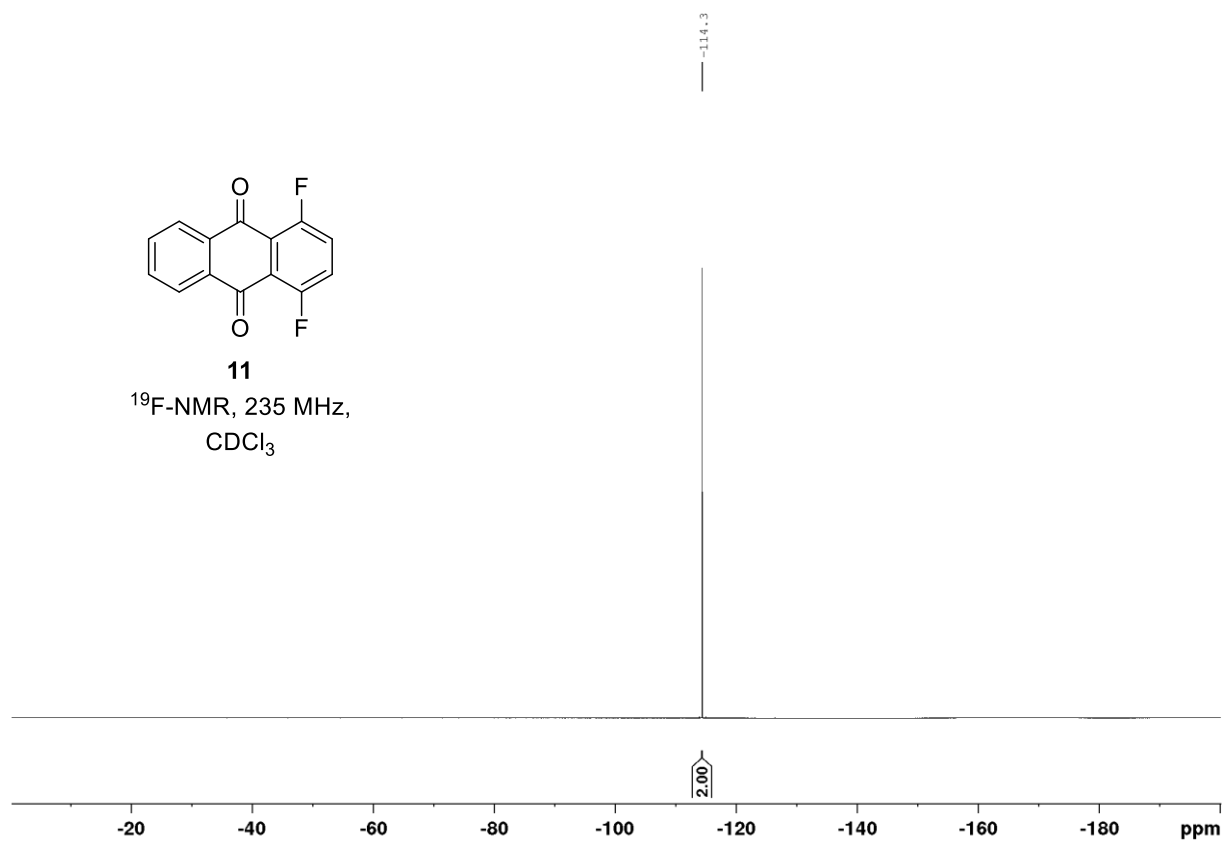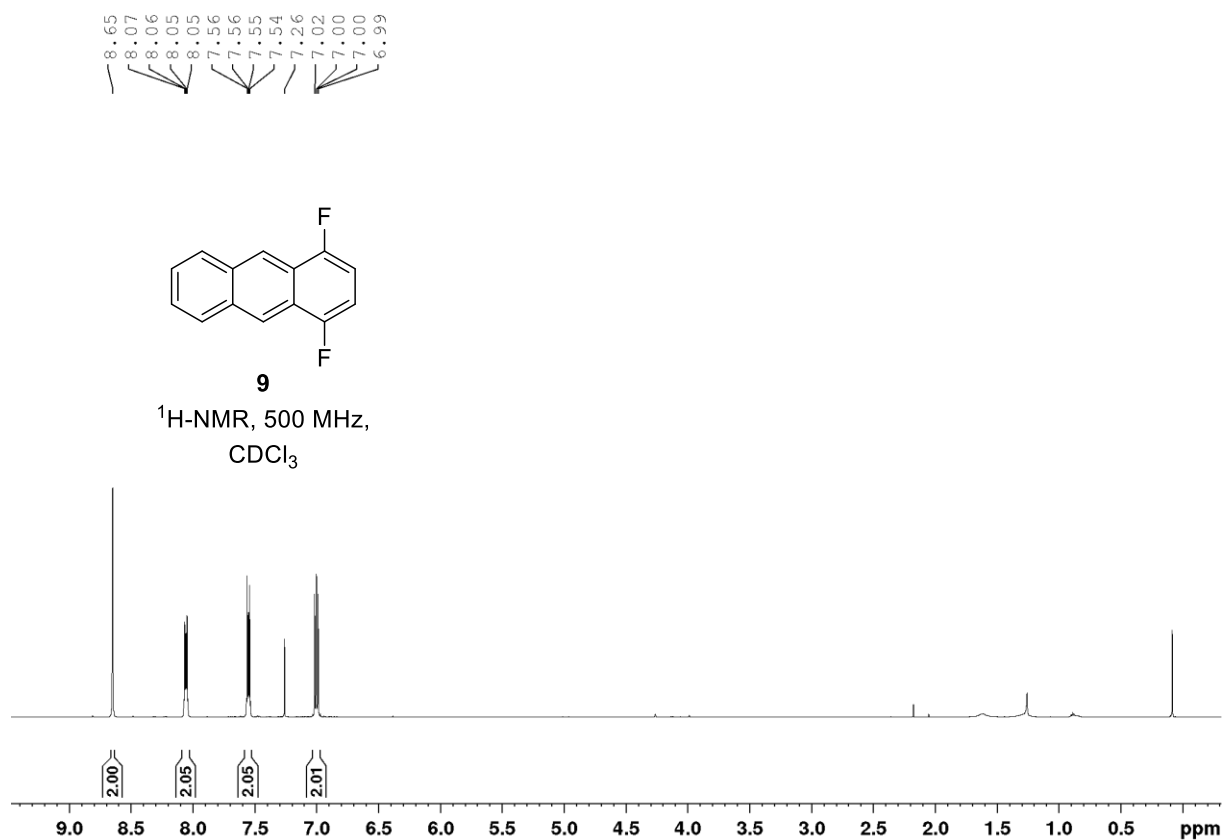

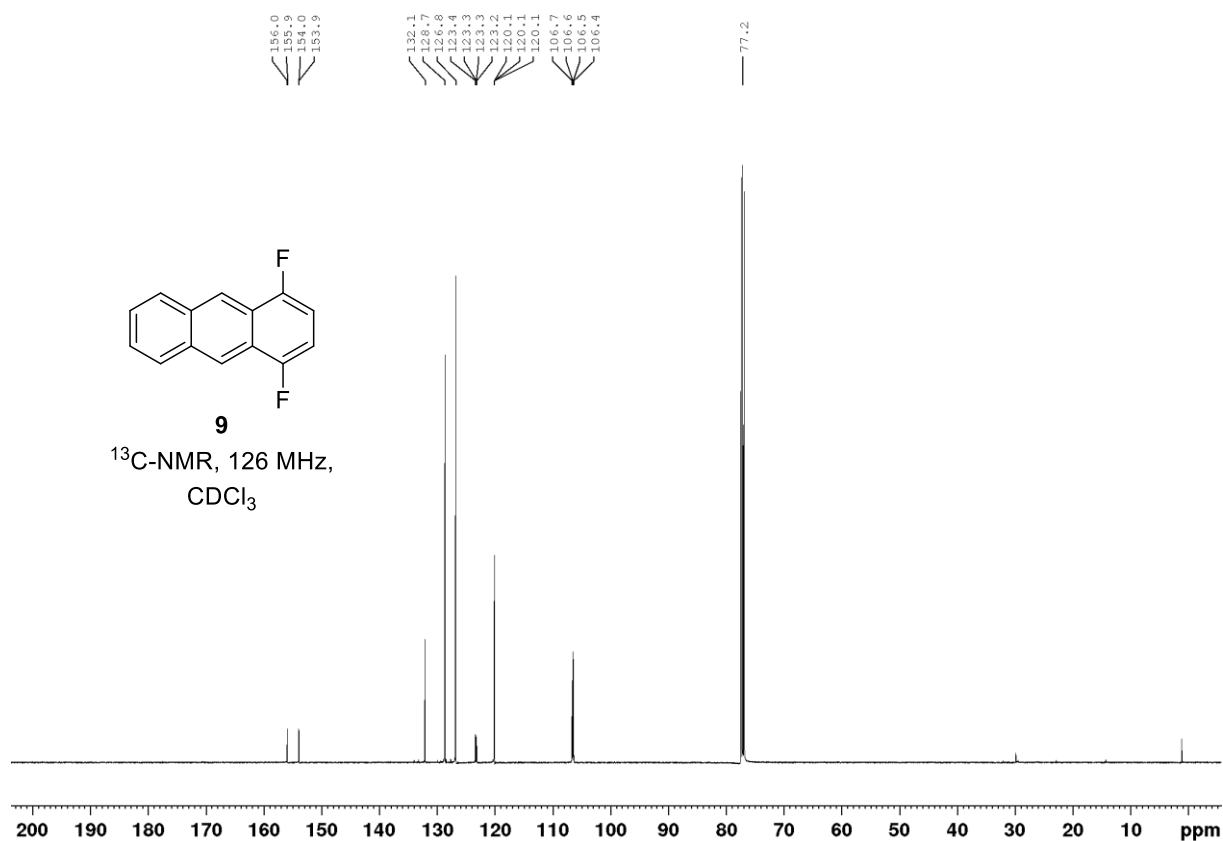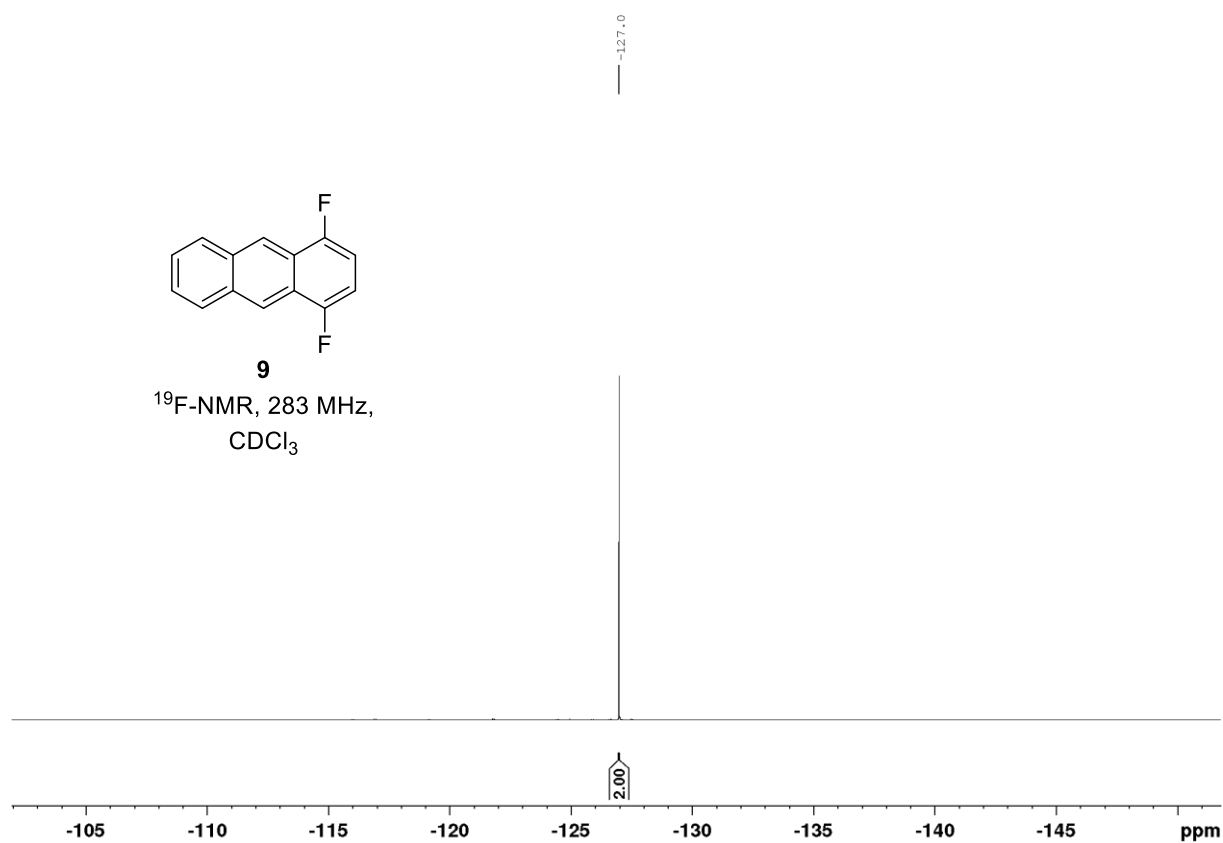

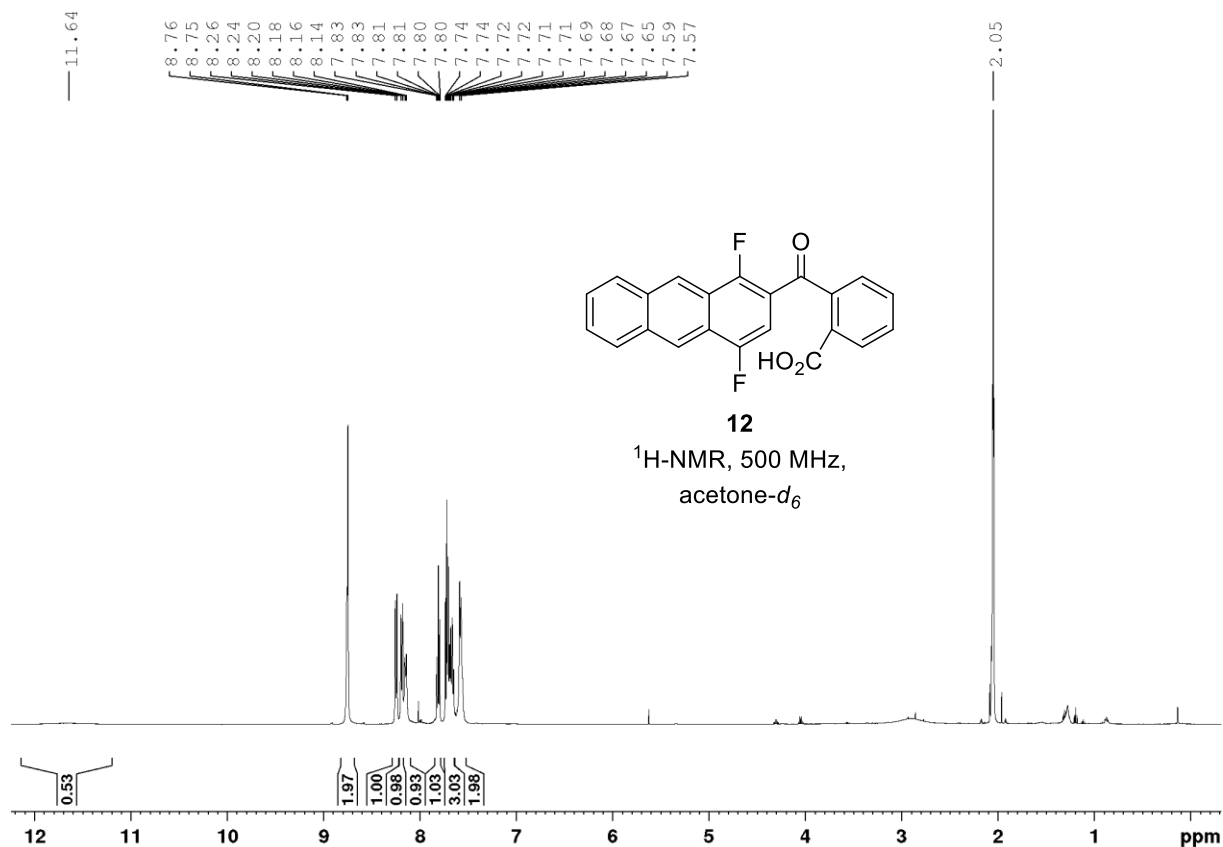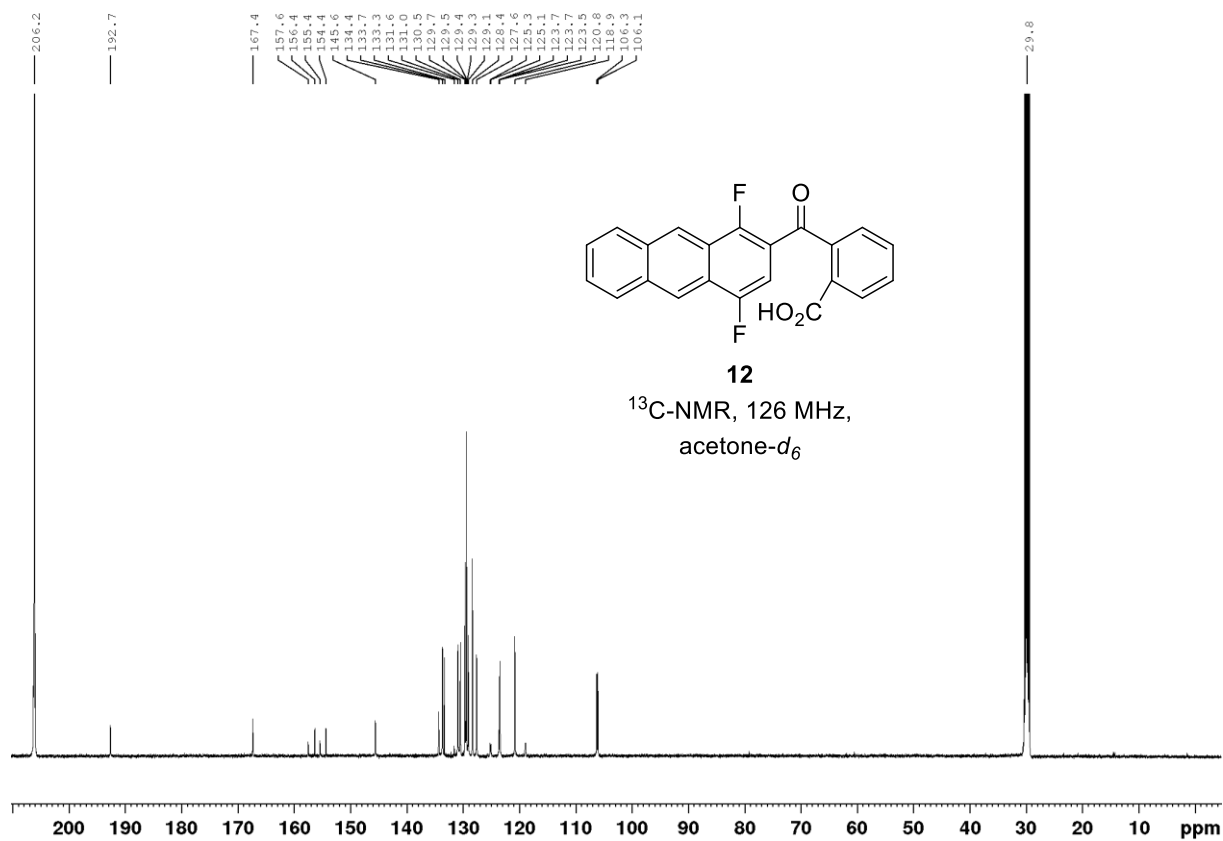

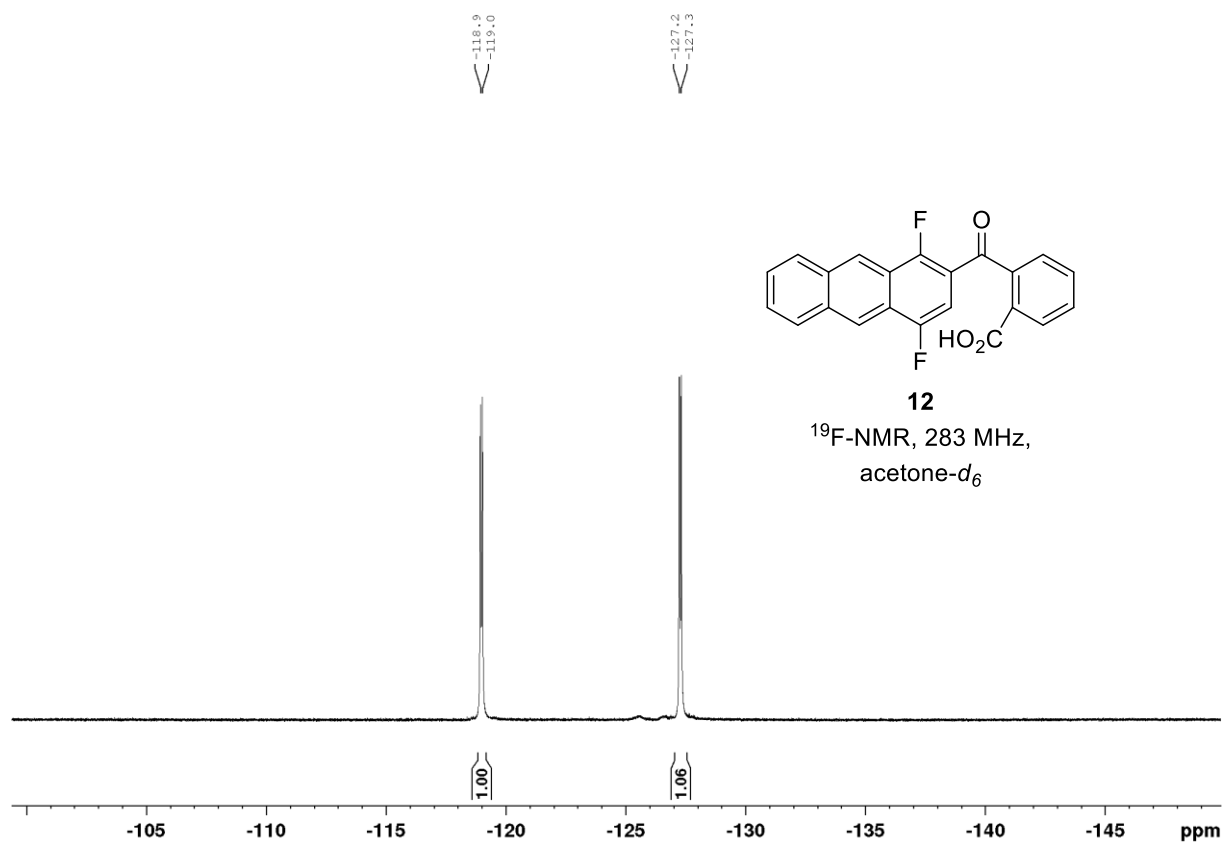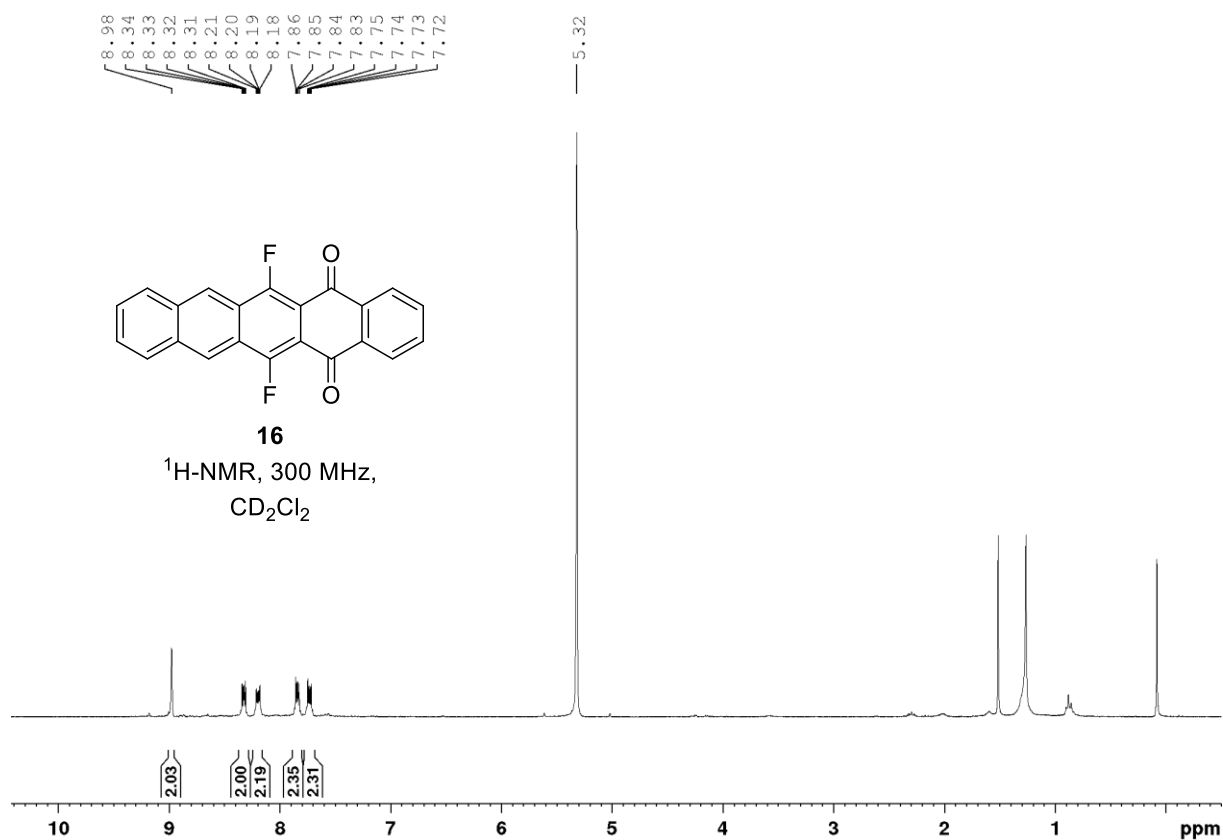



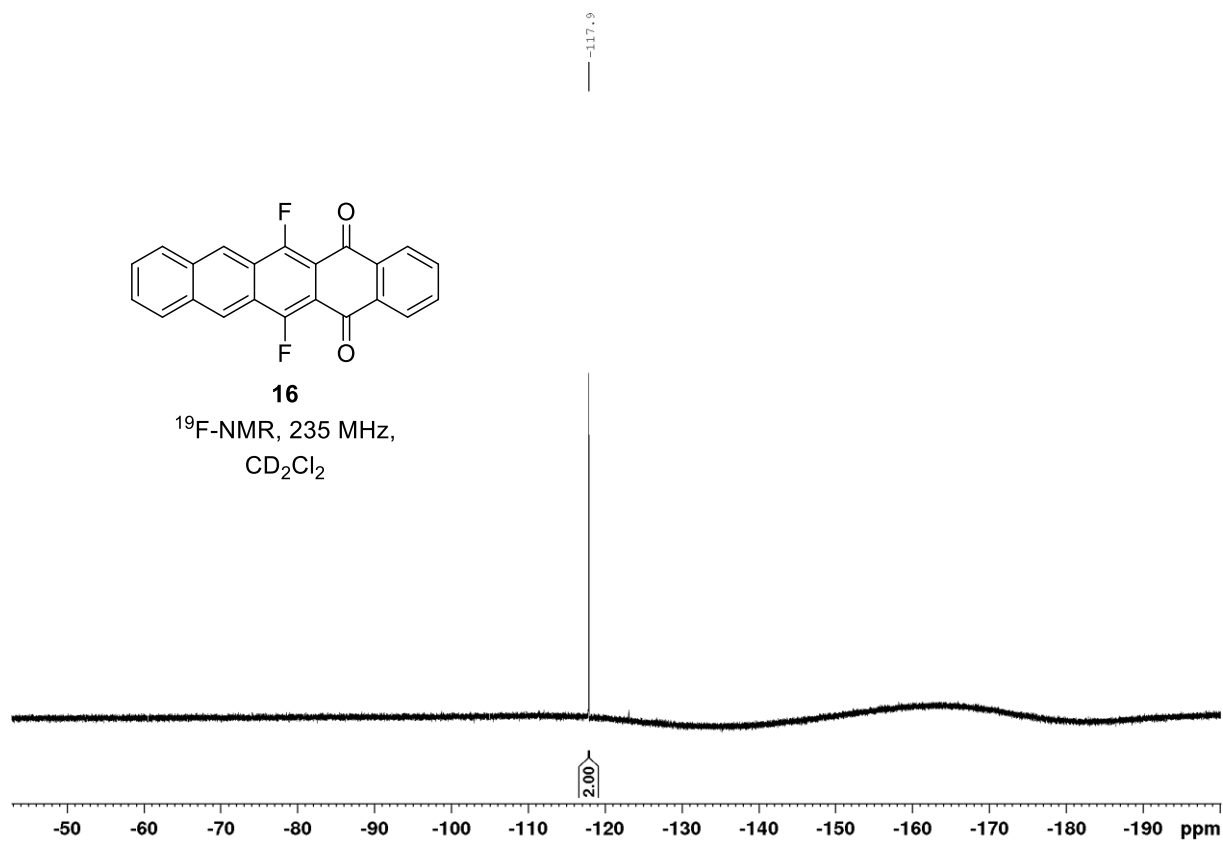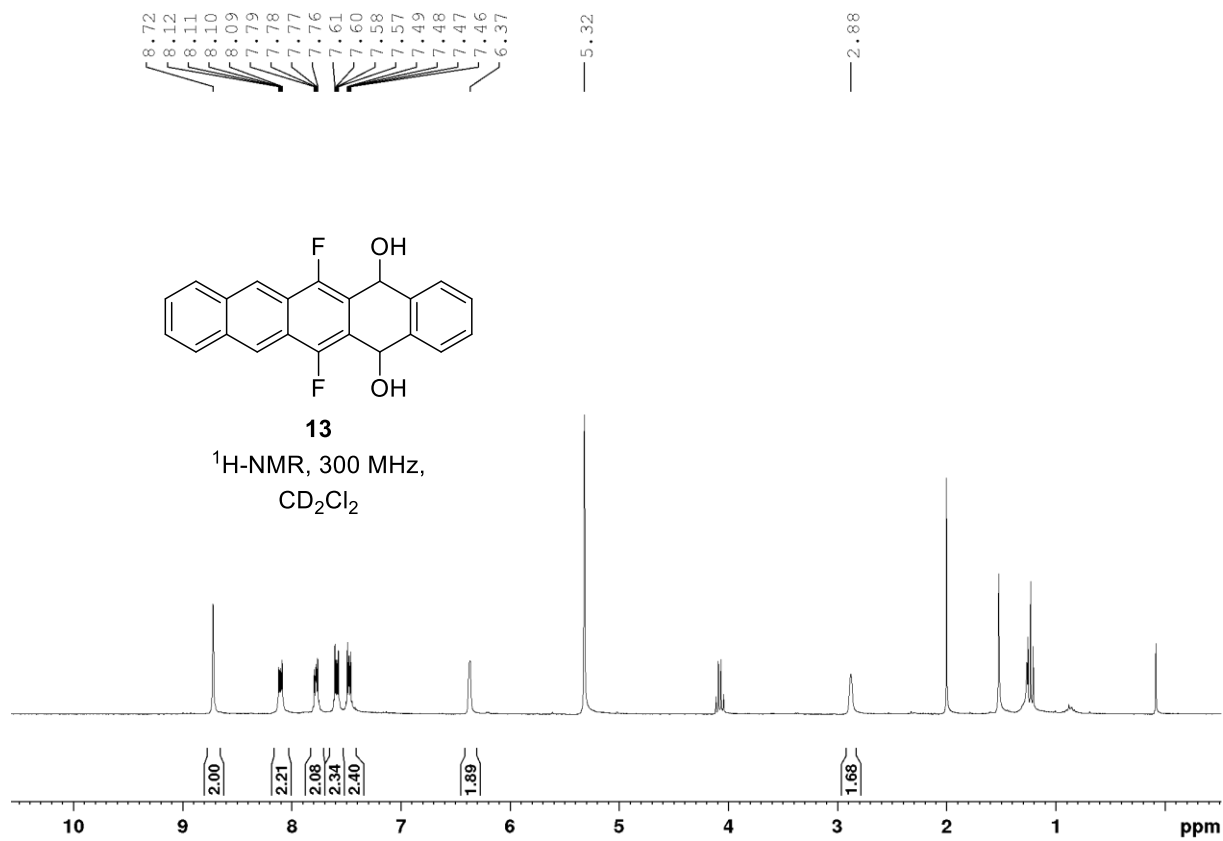

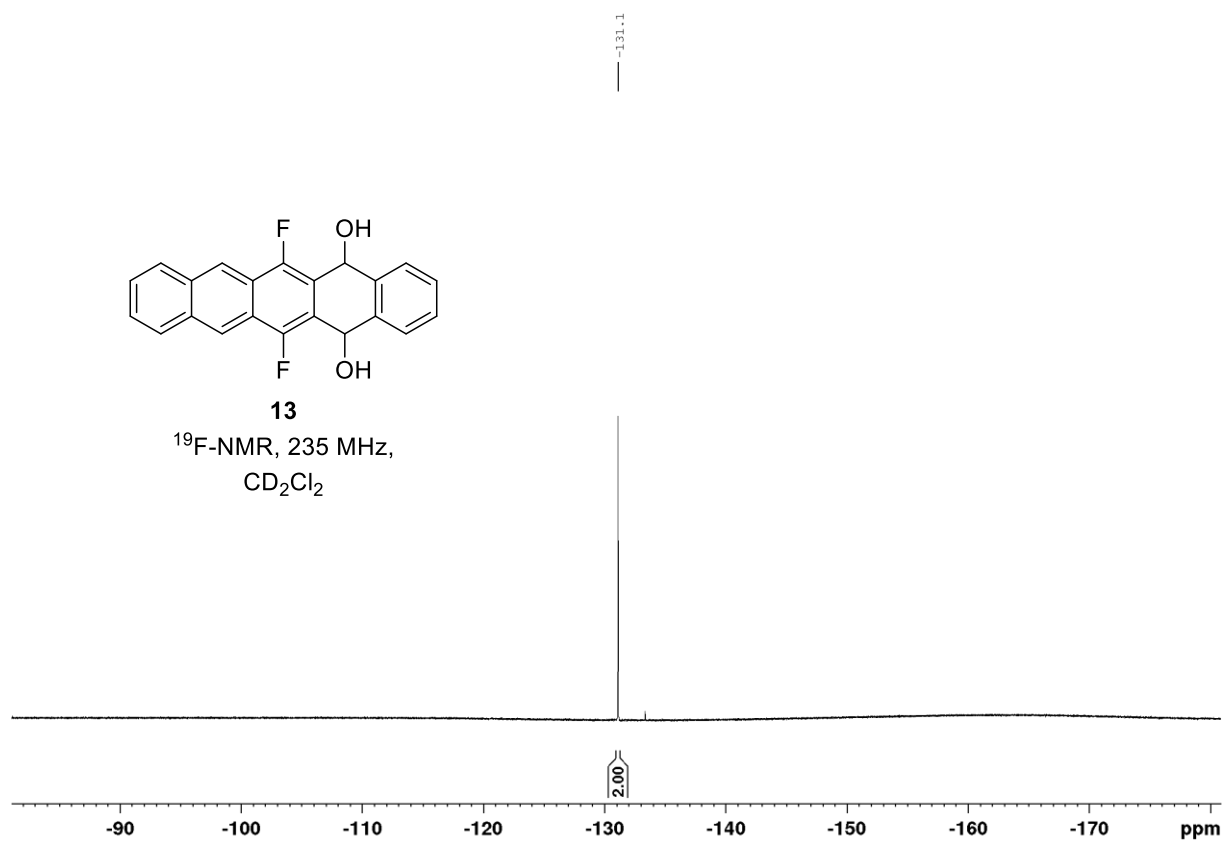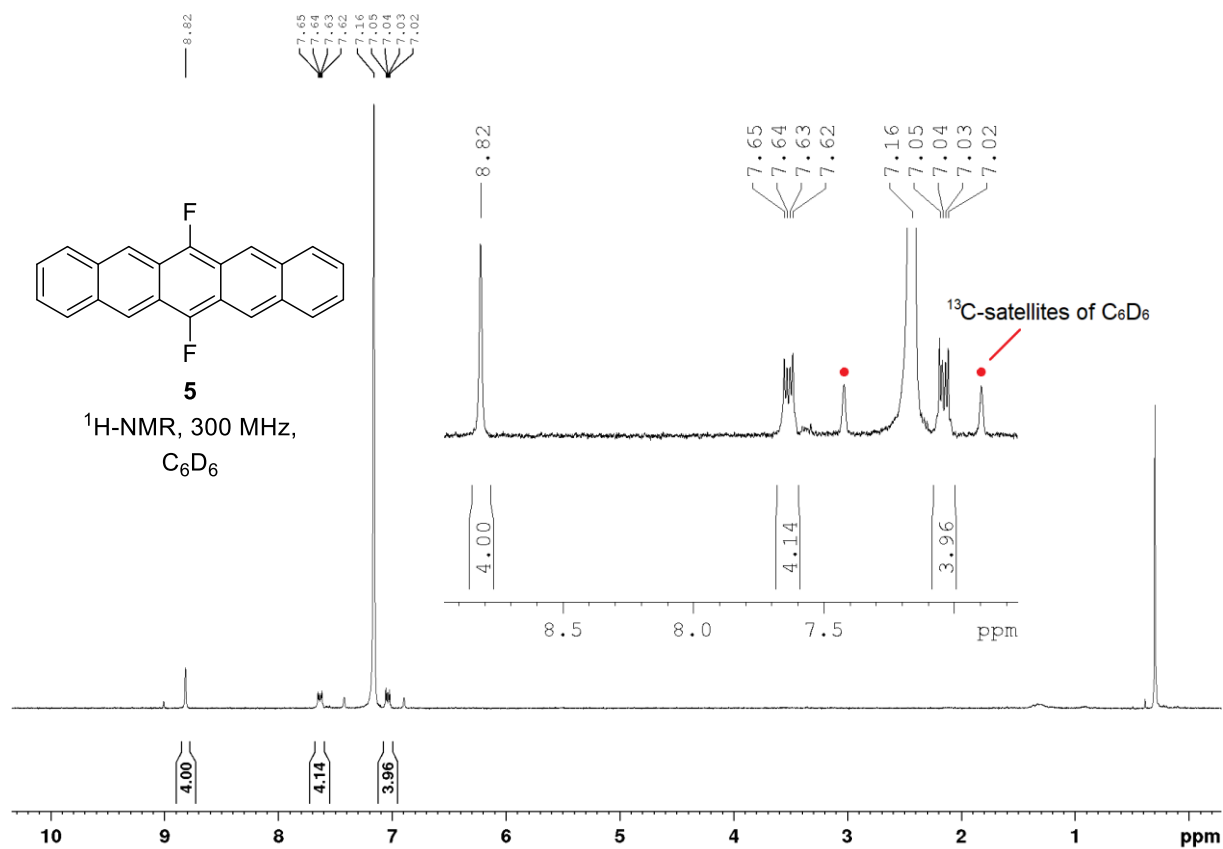

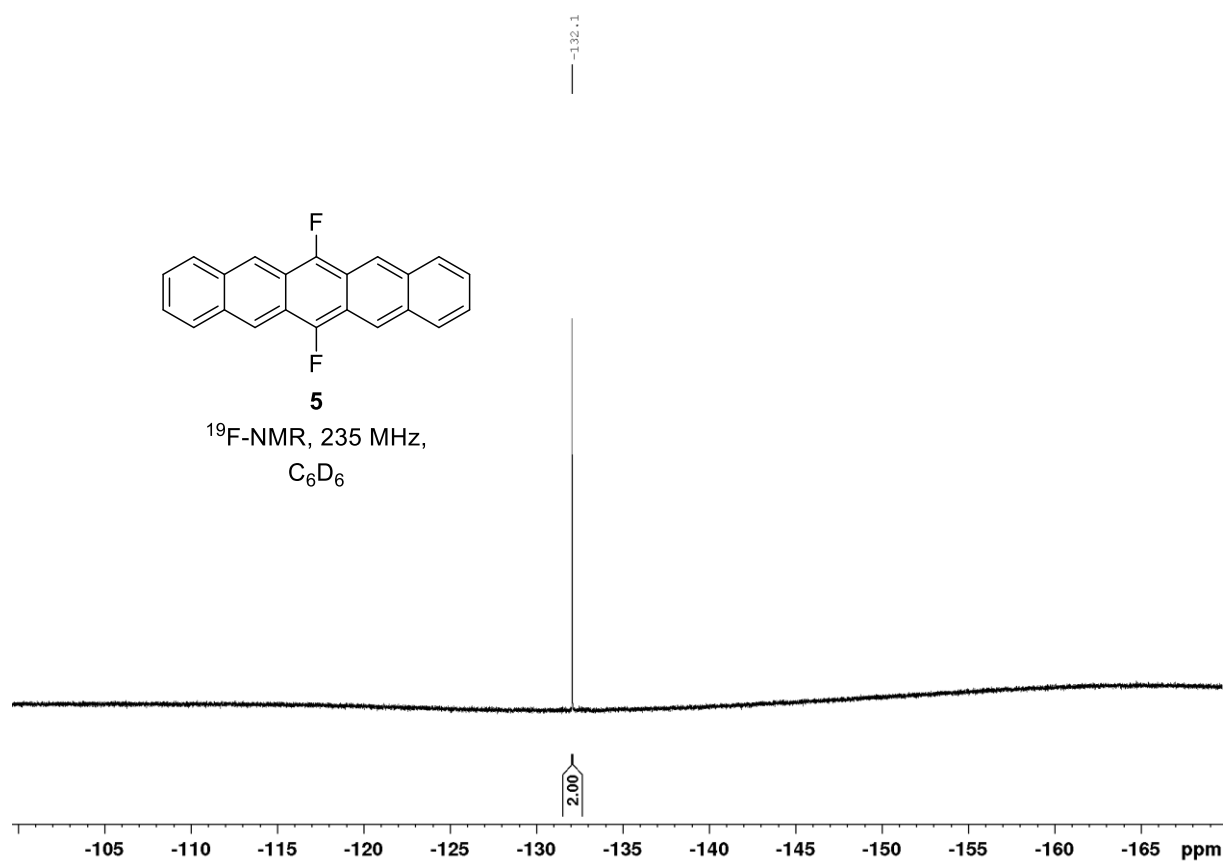

## 4. References

1. Krapcho, A. P.; Getahun, Z. *Synth. Commun.* **1985**, *15*, 907-910.
